# Supplementary material for: SNP and indel frequencies at transcription start sites and at canonical and alternative translation initiation sites in the human genome
Source: PubMed Central journal article supplement (PMC6461226; doi:10.1371/journal.pone.0214816), 2019-04-12
Supplement: pone.0214816.s002.pdf [file pone.0214816.s002.pdf]

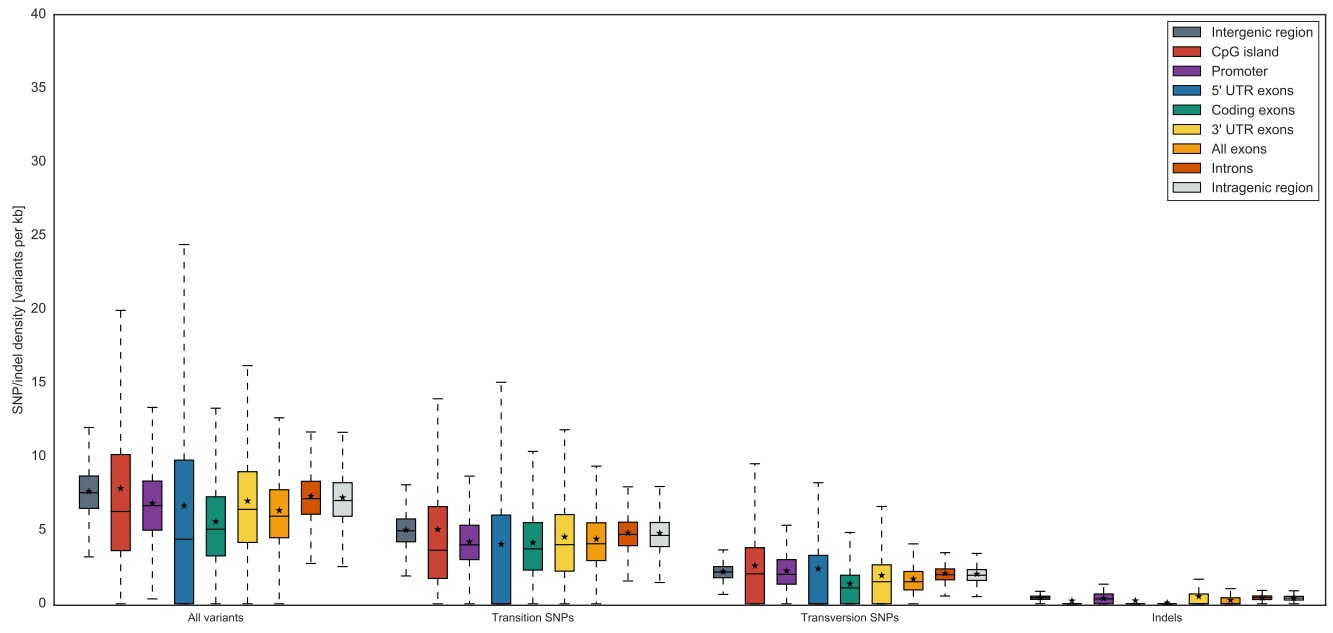

**S1 Fig.**
