# Supplementary material for: SNP and indel frequencies at transcription start sites and at canonical and alternative translation initiation sites in the human genome
Source: PubMed Central journal article supplement (PMC6461226; doi:10.1371/journal.pone.0214816), 2019-04-12
Supplement: pone.0214816.s008.pdf [file pone.0214816.s008.pdf]

**S1 Table**

| <b>Intergenic region</b> |              |            |                    |
|--------------------------|--------------|------------|--------------------|
|                          | median value | mean value | standard deviation |
| All variants             | 8.8          | 8.99       | 2.53               |
| Transition SNPs          | 5.61         | 5.72       | 1.74               |
| Transversion SNPs        | 2.52         | 2.59       | 0.98               |
| Indels                   | 0.64         | 0.68       | 0.41               |
| <b>CpG island</b>        |              |            |                    |
|                          | median value | mean value | standard deviation |
| All variants             | 9.46         | 10.91      | 7.51               |
| Transition SNPs          | 5.35         | 6.91       | 6.1                |
| Transversion SNPs        | 3.07         | 3.49       | 3.24               |
| Indels                   | 0.0          | 0.51       | 1.1                |
| <b>Promoter</b>          |              |            |                    |
|                          | median value | mean value | standard deviation |
| All variants             | 8.33         | 8.67       | 3.22               |
| Transition SNPs          | 5.0          | 5.19       | 2.22               |
| Transversion SNPs        | 2.67         | 2.84       | 1.34               |
| Indels                   | 0.67         | 0.64       | 0.55               |
| <b>5' UTR exons</b>      |              |            |                    |
|                          | median value | mean value | standard deviation |
| All variants             | 8.06         | 10.23      | 11.55              |
| Transition SNPs          | 4.0          | 6.04       | 8.53               |
| Transversion SNPs        | 0.0          | 3.68       | 6.71               |
| Indels                   | 0.0          | 0.51       | 2.13               |
| <b>Coding exons</b>      |              |            |                    |
|                          | median value | mean value | standard deviation |
| All variants             | 6.83         | 7.52       | 4.44               |
| Transition SNPs          | 4.98         | 5.56       | 3.49               |
| Transversion SNPs        | 1.56         | 1.87       | 1.77               |
| Indels                   | 0.0          | 0.09       | 0.36               |
| <b>3' UTR exons</b>      |              |            |                    |
|                          | median value | mean value | standard deviation |
| All variants             | 7.61         | 8.46       | 6.52               |
| Transition SNPs          | 4.73         | 5.42       | 5.05               |
| Transversion SNPs        | 1.9          | 2.39       | 3.08               |
| Indels                   | 0.0          | 0.66       | 1.37               |
| <b>All exons</b>         |              |            |                    |
|                          | median value | mean value | standard deviation |
| All variants             | 7.59         | 8.18       | 3.72               |
| Transition SNPs          | 5.15         | 5.63       | 2.84               |
| Transversion SNPs        | 1.98         | 2.22       | 1.45               |
| Indels                   | 0.18         | 0.33       | 0.46               |
| <b>Introns</b>           |              |            |                    |
|                          | median value | mean value | standard deviation |
| All variants             | 8.39         | 8.74       | 3.05               |
| Transition SNPs          | 5.37         | 5.62       | 2.16               |
| Transversion SNPs        | 2.34         | 2.48       | 1.11               |
| Indels                   | 0.61         | 0.64       | 0.39               |
| <b>Intragenic region</b> |              |            |                    |
|                          | median value | mean value | standard deviation |
| All variants             | 8.36         | 8.77       | 3.04               |
| Transition SNPs          | 5.39         | 5.71       | 2.16               |
| Transversion SNPs        | 2.32         | 2.48       | 1.09               |
| Indels                   | 0.57         | 0.58       | 0.34               |
