# Supplementary material for: SNP and indel frequencies at transcription start sites and at canonical and alternative translation initiation sites in the human genome
Source: PubMed Central journal article supplement (PMC6461226; doi:10.1371/journal.pone.0214816), 2019-04-12
Supplement: pone.0214816.s009.pdf [file pone.0214816.s009.pdf]

**S2 Table**

| <b>Intergenic region</b> |              |            |                    |
|--------------------------|--------------|------------|--------------------|
|                          | median value | mean value | standard deviation |
| All variants             | 7.54         | 7.63       | 2.21               |
| Transition SNPs          | 4.96         | 5.02       | 1.55               |
| Transversion SNPs        | 2.15         | 2.19       | 0.86               |
| Indels                   | 0.42         | 0.43       | 0.27               |
| <b>CpG island</b>        |              |            |                    |
|                          | median value | mean value | standard deviation |
| All variants             | 6.27         | 7.83       | 6.79               |
| Transition SNPs          | 3.64         | 5.05       | 5.42               |
| Transversion SNPs        | 2.03         | 2.58       | 2.95               |
| Indels                   | 0.0          | 0.2        | 0.7                |
| <b>Promoter</b>          |              |            |                    |
|                          | median value | mean value | standard deviation |
| All variants             | 6.67         | 6.83       | 2.77               |
| Transition SNPs          | 4.0          | 4.21       | 1.98               |
| Transversion SNPs        | 2.0          | 2.25       | 1.15               |
| Indels                   | 0.33         | 0.37       | 0.39               |
| <b>5' UTR exons</b>      |              |            |                    |
|                          | median value | mean value | standard deviation |
| All variants             | 4.39         | 6.64       | 9.23               |
| Transition SNPs          | 0.0          | 4.04       | 7.04               |
| Transversion SNPs        | 0.0          | 2.38       | 5.19               |
| Indels                   | 0.0          | 0.22       | 1.5                |
| <b>Coding exons</b>      |              |            |                    |
|                          | median value | mean value | standard deviation |
| All variants             | 5.06         | 5.58       | 3.53               |
| Transition SNPs          | 3.73         | 4.15       | 2.82               |
| Transversion SNPs        | 1.08         | 1.36       | 1.44               |
| Indels                   | 0.0          | 0.07       | 0.32               |
| <b>3' UTR exons</b>      |              |            |                    |
|                          | median value | mean value | standard deviation |
| All variants             | 6.41         | 6.98       | 5.36               |
| Transition SNPs          | 4.01         | 4.55       | 4.22               |
| Transversion SNPs        | 1.5          | 1.93       | 2.68               |
| Indels                   | 0.0          | 0.5        | 1.11               |
| <b>All exons</b>         |              |            |                    |
|                          | median value | mean value | standard deviation |
| All variants             | 5.95         | 6.34       | 2.97               |
| Transition SNPs          | 4.08         | 4.4        | 2.29               |
| Transversion SNPs        | 1.5          | 1.69       | 1.19               |
| Indels                   | 0.0          | 0.25       | 0.38               |
| <b>Introns</b>           |              |            |                    |
|                          | median value | mean value | standard deviation |
| All variants             | 7.14         | 7.31       | 2.39               |
| Transition SNPs          | 4.71         | 4.82       | 1.69               |
| Transversion SNPs        | 1.98         | 2.07       | 0.91               |
| Indels                   | 0.41         | 0.42       | 0.28               |
| <b>Intragenic region</b> |              |            |                    |
|                          | median value | mean value | standard deviation |
| All variants             | 7.01         | 7.21       | 2.42               |
| Transition SNPs          | 4.64         | 4.8        | 1.75               |
| Transversion SNPs        | 1.94         | 2.02       | 0.87               |
| Indels                   | 0.39         | 0.39       | 0.25               |
