# Supplementary material for: SNP and indel frequencies at transcription start sites and at canonical and alternative translation initiation sites in the human genome
Source: PubMed Central journal article supplement (PMC6461226; doi:10.1371/journal.pone.0214816), 2019-04-12
Supplement: pone.0214816.s010.pdf [file pone.0214816.s010.pdf]

**S3 Table**

| <b>Intergenic region</b> |              |                         |                         |        |
|--------------------------|--------------|-------------------------|-------------------------|--------|
|                          | All variants | Transition SNPs         | Transversion SNPs       | Indels |
| All variants             | 1.00         | 0.00                    | 0.00                    | 0.00   |
| Transition SNPs          | 0.00         | 1.00                    | 0.00                    | 0.00   |
| Transversion SNPs        | 0.00         | 0.00                    | 1.00                    | 0.00   |
| Indels                   | 0.00         | 0.00                    | 0.00                    | 1.00   |
| <b>CpG island</b>        |              |                         |                         |        |
|                          | All variants | Transition SNPs         | Transversion SNPs       | Indels |
| All variants             | 1.00         | 0.00                    | 0.00                    | 0.00   |
| Transition SNPs          | 0.00         | 1.00                    | 0.00                    | 0.00   |
| Transversion SNPs        | 0.00         | 0.00                    | 1.00                    | 0.00   |
| Indels                   | 0.00         | 0.00                    | 0.00                    | 1.00   |
| <b>Promoter</b>          |              |                         |                         |        |
|                          | All variants | Transition SNPs         | Transversion SNPs       | Indels |
| All variants             | 1.00         | 0.00                    | 0.00                    | 0.00   |
| Transition SNPs          | 0.00         | 1.00                    | 0.00                    | 0.00   |
| Transversion SNPs        | 0.00         | 0.00                    | 1.00                    | 0.00   |
| Indels                   | 0.00         | 0.00                    | 0.00                    | 1.00   |
| <b>5' UTR exons</b>      |              |                         |                         |        |
|                          | All variants | Transition SNPs         | Transversion SNPs       | Indels |
| All variants             | 1.00         | 0.00                    | 0.00                    | 0.00   |
| Transition SNPs          | 0.00         | 1.00                    | $3.68 \times 10^{-202}$ | 0.00   |
| Transversion SNPs        | 0.00         | $3.68 \times 10^{-202}$ | 1.00                    | 0.00   |
| Indels                   | 0.00         | 0.00                    | 0.00                    | 1.00   |
| <b>Coding exons</b>      |              |                         |                         |        |
|                          | All variants | Transition SNPs         | Transversion SNPs       | Indels |
| All variants             | 1.00         | 0.00                    | 0.00                    | 0.00   |
| Transition SNPs          | 0.00         | 1.00                    | 0.00                    | 0.00   |
| Transversion SNPs        | 0.00         | 0.00                    | 1.00                    | 0.00   |
| Indels                   | 0.00         | 0.00                    | 0.00                    | 1.00   |
| <b>3' UTR exons</b>      |              |                         |                         |        |
|                          | All variants | Transition SNPs         | Transversion SNPs       | Indels |
| All variants             | 1.00         | 0.00                    | 0.00                    | 0.00   |
| Transition SNPs          | 0.00         | 1.00                    | 0.00                    | 0.00   |
| Transversion SNPs        | 0.00         | 0.00                    | 1.00                    | 0.00   |
| Indels                   | 0.00         | 0.00                    | 0.00                    | 1.00   |
| <b>All exons</b>         |              |                         |                         |        |
|                          | All variants | Transition SNPs         | Transversion SNPs       | Indels |
| All variants             | 1.00         | 0.00                    | 0.00                    | 0.00   |
| Transition SNPs          | 0.00         | 1.00                    | 0.00                    | 0.00   |
| Transversion SNPs        | 0.00         | 0.00                    | 1.00                    | 0.00   |
| Indels                   | 0.00         | 0.00                    | 0.00                    | 1.00   |
| <b>Introns</b>           |              |                         |                         |        |
|                          | All variants | Transition SNPs         | Transversion SNPs       | Indels |
| All variants             | 1.00         | 0.00                    | 0.00                    | 0.00   |
| Transition SNPs          | 0.00         | 1.00                    | 0.00                    | 0.00   |
| Transversion SNPs        | 0.00         | 0.00                    | 1.00                    | 0.00   |
| Indels                   | 0.00         | 0.00                    | 0.00                    | 1.00   |
| <b>Intragenic region</b> |              |                         |                         |        |
|                          | All variants | Transition SNPs         | Transversion SNPs       | Indels |
| All variants             | 1.00         | 0.00                    | 0.00                    | 0.00   |
| Transition SNPs          | 0.00         | 1.00                    | 0.00                    | 0.00   |
| Transversion SNPs        | 0.00         | 0.00                    | 1.00                    | 0.00   |
| Indels                   | 0.00         | 0.00                    | 0.00                    | 1.00   |
