# Supplementary material for: SNP and indel frequencies at transcription start sites and at canonical and alternative translation initiation sites in the human genome
Source: PubMed Central journal article supplement (PMC6461226; doi:10.1371/journal.pone.0214816), 2019-04-12
Supplement: pone.0214816.s011.pdf [file pone.0214816.s011.pdf]

S4 Table

| <b>All variants</b>      |                         |                         |                         |                         |                         |                         |                         |                         |                         |
|--------------------------|-------------------------|-------------------------|-------------------------|-------------------------|-------------------------|-------------------------|-------------------------|-------------------------|-------------------------|
|                          | Intergenic region       | CpG island              | Promoter                | 5' UTR exons            | Coding exons            | 3' UTR exons            | All exons               | Introns                 | Intragenic region       |
| Intergenic region        | 1.00                    | $2.07 \times 10^{-64}$  | $3.88 \times 10^{-75}$  | $1.80 \times 10^{-32}$  | 0.00                    | $1.59 \times 10^{-218}$ | 0.00                    | $1.46 \times 10^{-55}$  | $4.84 \times 10^{-62}$  |
| CpG island               | $2.07 \times 10^{-64}$  | 1.00                    | $7.07 \times 10^{-159}$ | $9.13 \times 10^{-133}$ | 0.00                    | 0.00                    | 0.00                    | $1.78 \times 10^{-129}$ | $1.66 \times 10^{-132}$ |
| Promoter                 | $3.88 \times 10^{-75}$  | $7.07 \times 10^{-159}$ | 1.00                    | $4.12 \times 10^{-10}$  | 0.00                    | $1.46 \times 10^{-76}$  | $3.79 \times 10^{-100}$ | $1.12 \times 10^{-07}$  | $9.95 \times 10^{-07}$  |
| 5' UTR exons             | $1.80 \times 10^{-32}$  | $9.13 \times 10^{-133}$ | $4.12 \times 10^{-10}$  | 1.00                    | $1.86 \times 10^{-27}$  | $2.31 \times 10^{-03}$  | $1.43 \times 10^{-01}$  | $7.85 \times 10^{-14}$  | $4.52 \times 10^{-15}$  |
| Coding exons             | 0.00                    | 0.00                    | 0.00                    | $1.86 \times 10^{-27}$  | 1.00                    | $7.66 \times 10^{-54}$  | $1.05 \times 10^{-113}$ | 0.00                    | 0.00                    |
| 3' UTR exons             | $1.59 \times 10^{-218}$ | 0.00                    | $1.46 \times 10^{-76}$  | $2.31 \times 10^{-03}$  | $7.66 \times 10^{-54}$  | 1.00                    | $1.37 \times 10^{-02}$  | $2.84 \times 10^{-115}$ | $9.49 \times 10^{-118}$ |
| All exons                | 0.00                    | 0.00                    | $3.79 \times 10^{-100}$ | $1.43 \times 10^{-01}$  | $1.05 \times 10^{-113}$ | $1.37 \times 10^{-02}$  | 1.00                    | $1.44 \times 10^{-170}$ | $2.58 \times 10^{-171}$ |
| Introns                  | $1.46 \times 10^{-55}$  | $1.78 \times 10^{-129}$ | $1.12 \times 10^{-07}$  | $7.85 \times 10^{-14}$  | 0.00                    | $2.84 \times 10^{-115}$ | $1.44 \times 10^{-170}$ | 1.00                    | $3.92 \times 10^{-01}$  |
| Intragenic region        | $4.84 \times 10^{-62}$  | $1.66 \times 10^{-132}$ | $9.95 \times 10^{-07}$  | $4.52 \times 10^{-15}$  | 0.00                    | $9.49 \times 10^{-118}$ | $2.58 \times 10^{-171}$ | $3.92 \times 10^{-01}$  | 1.00                    |
| <b>Transition SNPs</b>   |                         |                         |                         |                         |                         |                         |                         |                         |                         |
|                          | Intergenic region       | CpG island              | Promoter                | 5' UTR exons            | Coding exons            | 3' UTR exons            | All exons               | Introns                 | Intragenic region       |
| Intergenic region        | 1.00                    | $1.31 \times 10^{-07}$  | $8.54 \times 10^{-283}$ | $4.59 \times 10^{-206}$ | $5.34 \times 10^{-112}$ | $6.29 \times 10^{-215}$ | $4.73 \times 10^{-83}$  | $3.07 \times 10^{-32}$  | $4.43 \times 10^{-23}$  |
| CpG island               | $1.31 \times 10^{-07}$  | 1.00                    | $1.54 \times 10^{-61}$  | $1.09 \times 10^{-250}$ | $3.54 \times 10^{-43}$  | $4.00 \times 10^{-117}$ | $5.19 \times 10^{-13}$  | $7.50 \times 10^{-01}$  | $2.87 \times 10^{-02}$  |
| Promoter                 | $8.54 \times 10^{-283}$ | $1.54 \times 10^{-61}$  | 1.00                    | $4.77 \times 10^{-97}$  | $2.98 \times 10^{-02}$  | $7.44 \times 10^{-17}$  | $2.82 \times 10^{-31}$  | $2.92 \times 10^{-156}$ | $2.43 \times 10^{-182}$ |
| 5' UTR exons             | $4.59 \times 10^{-206}$ | $1.09 \times 10^{-250}$ | $4.77 \times 10^{-97}$  | 1.00                    | $5.37 \times 10^{-121}$ | $5.36 \times 10^{-46}$  | $4.51 \times 10^{-156}$ | $3.79 \times 10^{-169}$ | $9.25 \times 10^{-191}$ |
| Coding exons             | $5.34 \times 10^{-112}$ | $3.54 \times 10^{-43}$  | $2.98 \times 10^{-02}$  | $5.37 \times 10^{-121}$ | 1.00                    | $2.10 \times 10^{-24}$  | $1.93 \times 10^{-14}$  | $9.25 \times 10^{-61}$  | $3.71 \times 10^{-77}$  |
| 3' UTR exons             | $6.29 \times 10^{-215}$ | $4.00 \times 10^{-117}$ | $7.44 \times 10^{-17}$  | $5.36 \times 10^{-46}$  | $2.10 \times 10^{-24}$  | 1.00                    | $1.06 \times 10^{-66}$  | $1.92 \times 10^{-142}$ | $1.67 \times 10^{-166}$ |
| All exons                | $4.73 \times 10^{-83}$  | $5.19 \times 10^{-13}$  | $2.82 \times 10^{-31}$  | $4.51 \times 10^{-156}$ | $1.93 \times 10^{-14}$  | $1.06 \times 10^{-66}$  | 1.00                    | $1.07 \times 10^{-30}$  | $2.96 \times 10^{-42}$  |
| Introns                  | $3.07 \times 10^{-32}$  | $7.50 \times 10^{-01}$  | $2.92 \times 10^{-156}$ | $3.79 \times 10^{-169}$ | $9.25 \times 10^{-61}$  | $1.92 \times 10^{-142}$ | $1.07 \times 10^{-30}$  | 1.00                    | $6.17 \times 10^{-02}$  |
| Intragenic region        | $4.43 \times 10^{-23}$  | $2.87 \times 10^{-02}$  | $2.43 \times 10^{-182}$ | $9.25 \times 10^{-191}$ | $3.71 \times 10^{-77}$  | $1.67 \times 10^{-166}$ | $2.96 \times 10^{-42}$  | $6.17 \times 10^{-02}$  | 1.00                    |
| <b>Transversion SNPs</b> |                         |                         |                         |                         |                         |                         |                         |                         |                         |
|                          | Intergenic region       | CpG island              | Promoter                | 5' UTR exons            | Coding exons            | 3' UTR exons            | All exons               | Introns                 | Intragenic region       |
| Intergenic region        | 1.00                    | $1.23 \times 10^{-139}$ | $1.11 \times 10^{-64}$  | $1.85 \times 10^{-206}$ | 0.00                    | 0.00                    | 0.00                    | $1.57 \times 10^{-84}$  | $6.33 \times 10^{-106}$ |
| CpG island               | $1.23 \times 10^{-139}$ | 1.00                    | $2.34 \times 10^{-34}$  | $4.37 \times 10^{-226}$ | 0.00                    | 0.00                    | 0.00                    | $3.44 \times 10^{-204}$ | $9.99 \times 10^{-214}$ |
| Promoter                 | $1.11 \times 10^{-64}$  | $2.34 \times 10^{-34}$  | 1.00                    | $2.00 \times 10^{-281}$ | 0.00                    | 0.00                    | 0.00                    | $2.11 \times 10^{-182}$ | $7.41 \times 10^{-201}$ |
| 5' UTR exons             | $1.85 \times 10^{-206}$ | $4.37 \times 10^{-226}$ | $2.00 \times 10^{-281}$ | 1.00                    | $2.70 \times 10^{-28}$  | $2.72 \times 10^{-26}$  | $2.86 \times 10^{-136}$ | $4.27 \times 10^{-175}$ | $2.61 \times 10^{-184}$ |
| Coding exons             | 0.00                    | 0.00                    | 0.00                    | $2.70 \times 10^{-28}$  | 1.00                    | $1.76 \times 10^{-35}$  | $3.15 \times 10^{-221}$ | 0.00                    | 0.00                    |
| 3' UTR exons             | 0.00                    | 0.00                    | 0.00                    | $2.72 \times 10^{-26}$  | $1.76 \times 10^{-35}$  | 1.00                    | $4.46 \times 10^{-28}$  | $5.64 \times 10^{-215}$ | $2.92 \times 10^{-216}$ |
| All exons                | 0.00                    | 0.00                    | 0.00                    | $2.86 \times 10^{-136}$ | $3.15 \times 10^{-221}$ | $4.46 \times 10^{-28}$  | 1.00                    | $2.68 \times 10^{-274}$ | $3.40 \times 10^{-269}$ |
| Introns                  | $1.57 \times 10^{-84}$  | $3.44 \times 10^{-204}$ | $2.11 \times 10^{-182}$ | $4.27 \times 10^{-175}$ | 0.00                    | $5.64 \times 10^{-215}$ | $2.68 \times 10^{-274}$ | 1.00                    | $2.89 \times 10^{-02}$  |
| Intragenic region        | $6.33 \times 10^{-106}$ | $9.99 \times 10^{-214}$ | $7.41 \times 10^{-201}$ | $2.61 \times 10^{-184}$ | 0.00                    | $2.92 \times 10^{-216}$ | $3.40 \times 10^{-269}$ | $2.89 \times 10^{-02}$  | 1.00                    |
| <b>Indels</b>            |                         |                         |                         |                         |                         |                         |                         |                         |                         |
|                          | Intergenic region       | CpG island              | Promoter                | 5' UTR exons            | Coding exons            | 3' UTR exons            | All exons               | Introns                 | Intragenic region       |
| Intergenic region        | 1.00                    | 0.00                    | $4.57 \times 10^{-78}$  | 0.00                    | 0.00                    | 0.00                    | 0.00                    | $1.08 \times 10^{-29}$  | $8.07 \times 10^{-148}$ |
| CpG island               | 0.00                    | 1.00                    | 0.00                    | $1.44 \times 10^{-151}$ | $9.51 \times 10^{-247}$ | $2.55 \times 10^{-118}$ | $2.41 \times 10^{-145}$ | 0.00                    | 0.00                    |
| Promoter                 | $4.57 \times 10^{-78}$  | 0.00                    | 1.00                    | 0.00                    | 0.00                    | 0.00                    | 0.00                    | $1.55 \times 10^{-23}$  | $7.96 \times 10^{-01}$  |
| 5' UTR exons             | 0.00                    | $1.44 \times 10^{-151}$ | 0.00                    | 1.00                    | $2.10 \times 10^{-02}$  | 0.00                    | 0.00                    | 0.00                    | 0.00                    |
| Coding exons             | 0.00                    | $9.51 \times 10^{-247}$ | 0.00                    | $2.10 \times 10^{-02}$  | 1.00                    | 0.00                    | 0.00                    | 0.00                    | 0.00                    |
| 3' UTR exons             | 0.00                    | $2.55 \times 10^{-118}$ | 0.00                    | 0.00                    | 0.00                    | 1.00                    | $9.06 \times 10^{-08}$  | 0.00                    | 0.00                    |
| All exons                | 0.00                    | $2.41 \times 10^{-145}$ | 0.00                    | 0.00                    | 0.00                    | $9.06 \times 10^{-08}$  | 1.00                    | 0.00                    | 0.00                    |
| Introns                  | $1.08 \times 10^{-29}$  | 0.00                    | $1.55 \times 10^{-23}$  | 0.00                    | 0.00                    | 0.00                    | 0.00                    | 1.00                    | $7.54 \times 10^{-43}$  |
| Intragenic region        | $8.07 \times 10^{-148}$ | 0.00                    | $7.96 \times 10^{-01}$  | 0.00                    | 0.00                    | 0.00                    | 0.00                    | $7.54 \times 10^{-43}$  | 1.00                    |
