# Supplementary material for: SNP and indel frequencies at transcription start sites and at canonical and alternative translation initiation sites in the human genome
Source: PubMed Central journal article supplement (PMC6461226; doi:10.1371/journal.pone.0214816), 2019-04-12
Supplement: pone.0214816.s012.pdf [file pone.0214816.s012.pdf]

**S5 Table**

| <b>Intergenic region</b> |                         |                         |                         |        |
|--------------------------|-------------------------|-------------------------|-------------------------|--------|
|                          | All variants            | Transition SNPs         | Transversion SNPs       | Indels |
| All variants             | 1.00                    | 0.00                    | 0.00                    | 0.00   |
| Transition SNPs          | 0.00                    | 1.00                    | 0.00                    | 0.00   |
| Transversion SNPs        | 0.00                    | 0.00                    | 1.00                    | 0.00   |
| Indels                   | 0.00                    | 0.00                    | 0.00                    | 1.00   |
| <b>CpG island</b>        |                         |                         |                         |        |
|                          | All variants            | Transition SNPs         | Transversion SNPs       | Indels |
| All variants             | 1.00                    | 0.00                    | 0.00                    | 0.00   |
| Transition SNPs          | 0.00                    | 1.00                    | 0.00                    | 0.00   |
| Transversion SNPs        | 0.00                    | 0.00                    | 1.00                    | 0.00   |
| Indels                   | 0.00                    | 0.00                    | 0.00                    | 1.00   |
| <b>Promoter</b>          |                         |                         |                         |        |
|                          | All variants            | Transition SNPs         | Transversion SNPs       | Indels |
| All variants             | 1.00                    | 0.00                    | 0.00                    | 0.00   |
| Transition SNPs          | 0.00                    | 1.00                    | 0.00                    | 0.00   |
| Transversion SNPs        | 0.00                    | 0.00                    | 1.00                    | 0.00   |
| Indels                   | 0.00                    | 0.00                    | 0.00                    | 1.00   |
| <b>5' UTR exons</b>      |                         |                         |                         |        |
|                          | All variants            | Transition SNPs         | Transversion SNPs       | Indels |
| All variants             | 1.00                    | $1.77 \times 10^{-195}$ | 0.00                    | 0.00   |
| Transition SNPs          | $1.77 \times 10^{-195}$ | 1.00                    | $3.58 \times 10^{-127}$ | 0.00   |
| Transversion SNPs        | 0.00                    | $3.58 \times 10^{-127}$ | 1.00                    | 0.00   |
| Indels                   | 0.00                    | 0.00                    | 0.00                    | 1.00   |
| <b>Coding exons</b>      |                         |                         |                         |        |
|                          | All variants            | Transition SNPs         | Transversion SNPs       | Indels |
| All variants             | 1.00                    | 0.00                    | 0.00                    | 0.00   |
| Transition SNPs          | 0.00                    | 1.00                    | 0.00                    | 0.00   |
| Transversion SNPs        | 0.00                    | 0.00                    | 1.00                    | 0.00   |
| Indels                   | 0.00                    | 0.00                    | 0.00                    | 1.00   |
| <b>3' UTR exons</b>      |                         |                         |                         |        |
|                          | All variants            | Transition SNPs         | Transversion SNPs       | Indels |
| All variants             | 1.00                    | 0.00                    | 0.00                    | 0.00   |
| Transition SNPs          | 0.00                    | 1.00                    | 0.00                    | 0.00   |
| Transversion SNPs        | 0.00                    | 0.00                    | 1.00                    | 0.00   |
| Indels                   | 0.00                    | 0.00                    | 0.00                    | 1.00   |
| <b>All exons</b>         |                         |                         |                         |        |
|                          | All variants            | Transition SNPs         | Transversion SNPs       | Indels |
| All variants             | 1.00                    | 0.00                    | 0.00                    | 0.00   |
| Transition SNPs          | 0.00                    | 1.00                    | 0.00                    | 0.00   |
| Transversion SNPs        | 0.00                    | 0.00                    | 1.00                    | 0.00   |
| Indels                   | 0.00                    | 0.00                    | 0.00                    | 1.00   |
| <b>Introns</b>           |                         |                         |                         |        |
|                          | All variants            | Transition SNPs         | Transversion SNPs       | Indels |
| All variants             | 1.00                    | 0.00                    | 0.00                    | 0.00   |
| Transition SNPs          | 0.00                    | 1.00                    | 0.00                    | 0.00   |
| Transversion SNPs        | 0.00                    | 0.00                    | 1.00                    | 0.00   |
| Indels                   | 0.00                    | 0.00                    | 0.00                    | 1.00   |
| <b>Intragenic region</b> |                         |                         |                         |        |
|                          | All variants            | Transition SNPs         | Transversion SNPs       | Indels |
| All variants             | 1.00                    | 0.00                    | 0.00                    | 0.00   |
| Transition SNPs          | 0.00                    | 1.00                    | 0.00                    | 0.00   |
| Transversion SNPs        | 0.00                    | 0.00                    | 1.00                    | 0.00   |
| Indels                   | 0.00                    | 0.00                    | 0.00                    | 1.00   |
