# Supplementary material for: SNP and indel frequencies at transcription start sites and at canonical and alternative translation initiation sites in the human genome
Source: PubMed Central journal article supplement (PMC6461226; doi:10.1371/journal.pone.0214816), 2019-04-12
Supplement: pone.0214816.s013.pdf [file pone.0214816.s013.pdf]

S6 Table

| <b>All variants</b>      |                         |                         |                         |                         |                         |                         |                         |                         |                         |
|--------------------------|-------------------------|-------------------------|-------------------------|-------------------------|-------------------------|-------------------------|-------------------------|-------------------------|-------------------------|
|                          | Intergenic region       | CpG island              | Promoter                | 5' UTR exons            | Coding exons            | 3' UTR exons            | All exons               | Introns                 | Intragenic region       |
| Intergenic region        | 1.00                    | $2.88 \times 10^{-191}$ | 0.00                    | 0.00                    | 0.00                    | $3.38 \times 10^{-249}$ | 0.00                    | $2.48 \times 10^{-79}$  | $1.11 \times 10^{-136}$ |
| CpG island               | $2.88 \times 10^{-191}$ | 1.00                    | $1.00 \times 10^{-08}$  | $9.81 \times 10^{-299}$ | $3.33 \times 10^{-220}$ | $8.71 \times 10^{-04}$  | $8.36 \times 10^{-18}$  | $6.98 \times 10^{-97}$  | $2.45 \times 10^{-76}$  |
| Promoter                 | 0.00                    | $1.00 \times 10^{-08}$  | 1.00                    | $1.12 \times 10^{-276}$ | 0.00                    | $3.95 \times 10^{-08}$  | $5.73 \times 10^{-93}$  | $3.13 \times 10^{-142}$ | $4.39 \times 10^{-95}$  |
| 5' UTR exons             | 0.00                    | $9.81 \times 10^{-299}$ | $1.12 \times 10^{-276}$ | 1.00                    | $3.55 \times 10^{-57}$  | $3.32 \times 10^{-170}$ | $1.78 \times 10^{-174}$ | 0.00                    | 0.00                    |
| Coding exons             | 0.00                    | $3.33 \times 10^{-220}$ | 0.00                    | $3.55 \times 10^{-57}$  | 1.00                    | $2.06 \times 10^{-199}$ | $3.29 \times 10^{-186}$ | 0.00                    | 0.00                    |
| 3' UTR exons             | $3.38 \times 10^{-249}$ | $8.71 \times 10^{-04}$  | $3.95 \times 10^{-08}$  | $3.32 \times 10^{-170}$ | $2.06 \times 10^{-199}$ | 1.00                    | $1.59 \times 10^{-21}$  | $7.08 \times 10^{-118}$ | $2.68 \times 10^{-88}$  |
| All exons                | 0.00                    | $8.36 \times 10^{-18}$  | $5.73 \times 10^{-93}$  | $1.78 \times 10^{-174}$ | $3.29 \times 10^{-186}$ | $1.59 \times 10^{-21}$  | 1.00                    | 0.00                    | 0.00                    |
| Introns                  | $2.48 \times 10^{-79}$  | $6.98 \times 10^{-97}$  | $3.13 \times 10^{-142}$ | 0.00                    | 0.00                    | $7.08 \times 10^{-118}$ | 0.00                    | 1.00                    | $1.41 \times 10^{-09}$  |
| Intragenic region        | $1.11 \times 10^{-136}$ | $2.45 \times 10^{-76}$  | $4.39 \times 10^{-95}$  | 0.00                    | 0.00                    | $2.68 \times 10^{-88}$  | 0.00                    | $1.41 \times 10^{-09}$  | 1.00                    |
| <b>Transition SNPs</b>   |                         |                         |                         |                         |                         |                         |                         |                         |                         |
|                          | Intergenic region       | CpG island              | Promoter                | 5' UTR exons            | Coding exons            | 3' UTR exons            | All exons               | Introns                 | Intragenic region       |
| Intergenic region        | 1.00                    | 0.00                    | 0.00                    | 0.00                    | 0.00                    | $9.35 \times 10^{-286}$ | 0.00                    | $9.37 \times 10^{-61}$  | $4.47 \times 10^{-87}$  |
| CpG island               | 0.00                    | 1.00                    | $7.27 \times 10^{-31}$  | 0.00                    | $6.44 \times 10^{-01}$  | $3.99 \times 10^{-04}$  | $2.17 \times 10^{-50}$  | $3.09 \times 10^{-288}$ | $2.21 \times 10^{-279}$ |
| Promoter                 | 0.00                    | $7.27 \times 10^{-31}$  | 1.00                    | 0.00                    | $4.54 \times 10^{-28}$  | $2.30 \times 10^{-01}$  | $2.00 \times 10^{-09}$  | 0.00                    | 0.00                    |
| 5' UTR exons             | 0.00                    | 0.00                    | 0.00                    | 1.00                    | 0.00                    | 0.00                    | 0.00                    | 0.00                    | 0.00                    |
| Coding exons             | 0.00                    | $6.44 \times 10^{-01}$  | $4.54 \times 10^{-28}$  | 0.00                    | 1.00                    | $1.67 \times 10^{-08}$  | $9.47 \times 10^{-54}$  | 0.00                    | 0.00                    |
| 3' UTR exons             | $9.35 \times 10^{-286}$ | $3.99 \times 10^{-04}$  | $2.30 \times 10^{-01}$  | 0.00                    | $1.67 \times 10^{-08}$  | 1.00                    | $1.26 \times 10^{-09}$  | $9.08 \times 10^{-167}$ | $1.27 \times 10^{-153}$ |
| All exons                | 0.00                    | $2.17 \times 10^{-50}$  | $2.00 \times 10^{-09}$  | 0.00                    | $9.47 \times 10^{-54}$  | $1.26 \times 10^{-09}$  | 1.00                    | $1.77 \times 10^{-215}$ | $8.20 \times 10^{-190}$ |
| Introns                  | $9.37 \times 10^{-61}$  | $3.09 \times 10^{-288}$ | 0.00                    | 0.00                    | 0.00                    | $9.08 \times 10^{-167}$ | $1.77 \times 10^{-215}$ | 1.00                    | $8.95 \times 10^{-04}$  |
| Intragenic region        | $4.47 \times 10^{-87}$  | $2.21 \times 10^{-279}$ | 0.00                    | 0.00                    | 0.00                    | $1.27 \times 10^{-153}$ | $8.20 \times 10^{-190}$ | $8.95 \times 10^{-04}$  | 1.00                    |
| <b>Transversion SNPs</b> |                         |                         |                         |                         |                         |                         |                         |                         |                         |
|                          | Intergenic region       | CpG island              | Promoter                | 5' UTR exons            | Coding exons            | 3' UTR exons            | All exons               | Introns                 | Intragenic region       |
| Intergenic region        | 1.00                    | $1.26 \times 10^{-12}$  | $1.60 \times 10^{-01}$  | 0.00                    | 0.00                    | 0.00                    | 0.00                    | $5.57 \times 10^{-106}$ | $3.37 \times 10^{-182}$ |
| CpG island               | $1.26 \times 10^{-12}$  | 1.00                    | $5.00 \times 10^{-20}$  | 0.00                    | 0.00                    | $2.74 \times 10^{-120}$ | $3.83 \times 10^{-89}$  | $9.65 \times 10^{-01}$  | $3.84 \times 10^{-02}$  |
| Promoter                 | $1.60 \times 10^{-01}$  | $5.00 \times 10^{-20}$  | 1.00                    | 0.00                    | 0.00                    | 0.00                    | 0.00                    | $1.98 \times 10^{-37}$  | $3.23 \times 10^{-70}$  |
| 5' UTR exons             | 0.00                    | 0.00                    | 0.00                    | 1.00                    | $5.64 \times 10^{-193}$ | $2.78 \times 10^{-201}$ | 0.00                    | 0.00                    | 0.00                    |
| Coding exons             | 0.00                    | 0.00                    | 0.00                    | $5.64 \times 10^{-193}$ | 1.00                    | $1.26 \times 10^{-73}$  | $4.99 \times 10^{-274}$ | 0.00                    | 0.00                    |
| 3' UTR exons             | 0.00                    | $2.74 \times 10^{-120}$ | 0.00                    | $2.78 \times 10^{-201}$ | $1.26 \times 10^{-73}$  | 1.00                    | $1.72 \times 10^{-13}$  | $1.56 \times 10^{-274}$ | $1.71 \times 10^{-243}$ |
| All exons                | 0.00                    | $3.83 \times 10^{-89}$  | 0.00                    | 0.00                    | $4.99 \times 10^{-274}$ | $1.72 \times 10^{-13}$  | 1.00                    | 0.00                    | 0.00                    |
| Introns                  | $5.57 \times 10^{-106}$ | $9.65 \times 10^{-01}$  | $1.98 \times 10^{-37}$  | 0.00                    | 0.00                    | $1.56 \times 10^{-274}$ | 0.00                    | 1.00                    | $2.47 \times 10^{-11}$  |
| Intragenic region        | $3.37 \times 10^{-182}$ | $3.84 \times 10^{-02}$  | $3.23 \times 10^{-70}$  | 0.00                    | 0.00                    | $1.71 \times 10^{-243}$ | 0.00                    | $2.47 \times 10^{-11}$  | 1.00                    |
| <b>Indels</b>            |                         |                         |                         |                         |                         |                         |                         |                         |                         |
|                          | Intergenic region       | CpG island              | Promoter                | 5' UTR exons            | Coding exons            | 3' UTR exons            | All exons               | Introns                 | Intragenic region       |
| Intergenic region        | 1.00                    | 0.00                    | $1.97 \times 10^{-234}$ | 0.00                    | 0.00                    | 0.00                    | 0.00                    | $6.26 \times 10^{-02}$  | $7.08 \times 10^{-43}$  |
| CpG island               | 0.00                    | 1.00                    | 0.00                    | $8.68 \times 10^{-34}$  | $1.25 \times 10^{-10}$  | 0.00                    | 0.00                    | 0.00                    | 0.00                    |
| Promoter                 | $1.97 \times 10^{-234}$ | 0.00                    | 1.00                    | 0.00                    | 0.00                    | $6.64 \times 10^{-95}$  | $3.65 \times 10^{-251}$ | $1.00 \times 10^{-180}$ | $1.99 \times 10^{-104}$ |
| 5' UTR exons             | 0.00                    | $8.68 \times 10^{-34}$  | 0.00                    | 1.00                    | $1.38 \times 10^{-09}$  | 0.00                    | 0.00                    | 0.00                    | 0.00                    |
| Coding exons             | 0.00                    | $1.25 \times 10^{-10}$  | 0.00                    | $1.38 \times 10^{-09}$  | 1.00                    | 0.00                    | 0.00                    | 0.00                    | 0.00                    |
| 3' UTR exons             | 0.00                    | 0.00                    | $6.64 \times 10^{-95}$  | 0.00                    | 0.00                    | 1.00                    | $5.77 \times 10^{-05}$  | 0.00                    | 0.00                    |
| All exons                | 0.00                    | 0.00                    | $3.65 \times 10^{-251}$ | 0.00                    | 0.00                    | $5.77 \times 10^{-05}$  | 1.00                    | 0.00                    | 0.00                    |
| Introns                  | $6.26 \times 10^{-02}$  | 0.00                    | $1.00 \times 10^{-180}$ | 0.00                    | 0.00                    | 0.00                    | 0.00                    | 1.00                    | $1.10 \times 10^{-28}$  |
| Intragenic region        | $7.08 \times 10^{-43}$  | 0.00                    | $1.99 \times 10^{-104}$ | 0.00                    | 0.00                    | 0.00                    | 0.00                    | $1.10 \times 10^{-28}$  | 1.00                    |
