# Supplementary material for: SNP and indel frequencies at transcription start sites and at canonical and alternative translation initiation sites in the human genome
Source: PubMed Central journal article supplement (PMC6461226; doi:10.1371/journal.pone.0214816), 2019-04-12
Supplement: pone.0214816.s014.pdf [file pone.0214816.s014.pdf]

**S7 Table**

|    | <b>Gene name</b> | <b>Element length [kb]</b> | <b>Nbr. of all SNPs</b> | <b>SNP density</b> |
|----|------------------|----------------------------|-------------------------|--------------------|
| 1  | HLADQB1          | 0.81                       | 71                      | 87.65              |
| 2  | HLADQA1          | 0.768                      | 67                      | 87.24              |
| 3  | HLADRB5          | 0.801                      | 68                      | 84.89              |
| 4  | CRIPAK           | 1.341                      | 92                      | 68.61              |
| 5  | IPLL5            | 0.645                      | 35                      | 54.26              |
| 6  | PRR21            | 1.17                       | 55                      | 47.01              |
| 7  | PRAMEF2          | 1.425                      | 61                      | 42.81              |
| 8  | KRTAP48          | 0.558                      | 22                      | 39.43              |
| 9  | PLIN4            | 4.074                      | 159                     | 39.03              |
| 10 | MUC4             | 16.239                     | 594                     | 36.58              |
| 11 | CCDC144NL        | 0.666                      | 24                      | 36.04              |
| 12 | DEFB108B         | 0.222                      | 8                       | 36.04              |
| 13 | IPLL1            | 0.642                      | 23                      | 35.83              |
| 14 | OR2T8            | 0.939                      | 33                      | 35.14              |
| 15 | ABO              | 1.064                      | 37                      | 34.77              |
| 16 | HRCT1            | 0.348                      | 12                      | 34.48              |
| 17 | HIST1H1C         | 0.642                      | 22                      | 34.27              |
| 18 | KRTAP47          | 0.468                      | 16                      | 34.19              |
| 19 | KRTAP411         | 0.588                      | 20                      | 34.01              |
| 20 | SLC35G4          | 1.017                      | 34                      | 33.43              |
| 21 | KIR3DL1          | 1.335                      | 44                      | 32.96              |
| 22 | GGTLC2           | 0.759                      | 25                      | 32.94              |
| 23 | OR5H6            | 0.978                      | 31                      | 31.7               |
| 24 | KIR2DL1          | 1.047                      | 33                      | 31.52              |
| 25 | OR51F1           | 0.939                      | 29                      | 30.88              |
| 26 | IGIP             | 0.162                      | 5                       | 30.86              |
| 27 | FAM90A1          | 1.395                      | 43                      | 30.82              |
| 28 | CELA3B           | 0.813                      | 25                      | 30.75              |
| 29 | C9orf66          | 0.888                      | 27                      | 30.41              |
| 30 | FAM86C1          | 0.396                      | 12                      | 30.3               |
| 31 | KRTAP32          | 0.297                      | 9                       | 30.3               |
| 32 | OR8U1            | 0.93                       | 27                      | 29.03              |
| 33 | KRTAP96          | 0.483                      | 14                      | 28.99              |
| 34 | HIST1H2BF        | 0.381                      | 11                      | 28.87              |
| 35 | HIST1H1E         | 0.66                       | 19                      | 28.79              |
| 36 | HIST1H2BA        | 0.384                      | 11                      | 28.65              |
| 37 | HIST1H1D         | 0.666                      | 19                      | 28.53              |
| 38 | PDIA2            | 1.578                      | 45                      | 28.52              |
| 39 | GPRIN2           | 1.377                      | 39                      | 28.32              |
| 40 | PI3              | 0.354                      | 10                      | 28.25              |
| 41 | PSG9             | 1.281                      | 36                      | 28.1               |
| 42 | DEFA5            | 0.285                      | 8                       | 28.07              |
| 43 | OR5H14           | 0.933                      | 26                      | 27.87              |
| 44 | SCGB1C1          | 0.288                      | 8                       | 27.78              |
| 45 | OR2T4            | 1.047                      | 29                      | 27.7               |
| 46 | AHNAK2           | 17.388                     | 480                     | 27.61              |
| 47 | PRAMEF10         | 1.425                      | 39                      | 27.37              |
| 48 | LILRA1           | 1.47                       | 40                      | 27.21              |
| 49 | OR13C5           | 0.957                      | 26                      | 27.17              |
| 50 | HGC63            | 0.516                      | 14                      | 27.13              |

|     | <b>Gene name</b> | <b>Element length [kb]</b> | <b>Nbr. of all SNPs</b> | <b>SNP density</b> |
|-----|------------------|----------------------------|-------------------------|--------------------|
| 51  | LCE2B            | 0.333                      | 9                       | 27.03              |
| 52  | CPZ              | 1.926                      | 52                      | 27.0               |
| 53  | CYP2A7           | 1.485                      | 40                      | 26.94              |
| 54  | CD52             | 0.186                      | 5                       | 26.88              |
| 55  | KRTAP49          | 0.633                      | 17                      | 26.86              |
| 56  | HS3ST6           | 0.936                      | 25                      | 26.71              |
| 57  | MTRNR2L5         | 0.075                      | 2                       | 26.67              |
| 58  | MTRNR2L9         | 0.075                      | 2                       | 26.67              |
| 59  | TRIM48           | 0.675                      | 18                      | 26.67              |
| 60  | HIGD1B           | 0.3                        | 8                       | 26.67              |
| 61  | LILRB1           | 1.953                      | 52                      | 26.63              |
| 62  | TPSB2            | 0.828                      | 22                      | 26.57              |
| 63  | MRPL53           | 0.339                      | 9                       | 26.55              |
| 64  | INMT             | 0.792                      | 21                      | 26.52              |
| 65  | MT4              | 0.189                      | 5                       | 26.46              |
| 66  | OR2T27           | 0.954                      | 25                      | 26.21              |
| 67  | LILRA2           | 1.452                      | 38                      | 26.17              |
| 68  | OR6K6            | 1.032                      | 27                      | 26.16              |
| 69  | S100A7A          | 0.306                      | 8                       | 26.14              |
| 70  | CYP2D6           | 1.341                      | 35                      | 26.1               |
| 71  | LOC100132146     | 0.27                       | 7                       | 25.93              |
| 72  | TMEM244          | 0.387                      | 10                      | 25.84              |
| 73  | LILRA3           | 1.32                       | 34                      | 25.76              |
| 74  | USP17L7          | 1.593                      | 41                      | 25.74              |
| 75  | ACTG1            | 1.128                      | 29                      | 25.71              |
| 76  | HIST1H4B         | 0.312                      | 8                       | 25.64              |
| 77  | PRM1             | 0.156                      | 4                       | 25.64              |
| 78  | OR10G9           | 0.936                      | 24                      | 25.64              |
| 79  | HIST1H4J         | 0.312                      | 8                       | 25.64              |
| 80  | C20orf166        | 0.354                      | 9                       | 25.42              |
| 81  | OBP2A            | 0.513                      | 13                      | 25.34              |
| 82  | PTX4             | 1.422                      | 36                      | 25.32              |
| 83  | FLG              | 12.186                     | 308                     | 25.27              |
| 84  | LCE1E            | 0.357                      | 9                       | 25.21              |
| 85  | MC1R             | 0.954                      | 24                      | 25.16              |
| 86  | PSG6             | 1.275                      | 32                      | 25.1               |
| 87  | LCE3D            | 0.279                      | 7                       | 25.09              |
| 88  | LRP5L            | 0.759                      | 19                      | 25.03              |
| 89  | HIST1H1B         | 0.681                      | 17                      | 24.96              |
| 90  | C14orf180        | 0.483                      | 12                      | 24.84              |
| 91  | MS4A13           | 0.282                      | 7                       | 24.82              |
| 92  | CCL22            | 0.282                      | 7                       | 24.82              |
| 93  | OR2T6            | 0.927                      | 23                      | 24.81              |
| 94  | AMZ1             | 1.497                      | 37                      | 24.72              |
| 95  | LOC100134391     | 0.891                      | 22                      | 24.69              |
| 96  | ALG1L2           | 0.648                      | 16                      | 24.69              |
| 97  | DAPL1            | 0.324                      | 8                       | 24.69              |
| 98  | PSG1             | 1.26                       | 31                      | 24.6               |
| 99  | KRTAP14          | 0.366                      | 9                       | 24.59              |
| 100 | OR10G4           | 0.936                      | 23                      | 24.57              |
