# Supplementary material for: SNP and indel frequencies at transcription start sites and at canonical and alternative translation initiation sites in the human genome
Source: PubMed Central journal article supplement (PMC6461226; doi:10.1371/journal.pone.0214816), 2019-04-12
Supplement: pone.0214816.s015.pdf [file pone.0214816.s015.pdf]

**S8 Table**

|    | <b>Gene name</b> | <b>Element length [kb]</b> | <b>Nbr. of all SNPs</b> | <b>SNP density</b> |
|----|------------------|----------------------------|-------------------------|--------------------|
| 1  | HLADQA1          | 3.0                        | 300                     | 100.0              |
| 2  | HLADQB1          | 3.0                        | 299                     | 99.67              |
| 3  | IPLL5            | 3.0                        | 189                     | 63.0               |
| 4  | PSG4             | 3.0                        | 143                     | 47.67              |
| 5  | MTRNR2L1         | 3.0                        | 132                     | 44.0               |
| 6  | PSG7             | 3.0                        | 121                     | 40.33              |
| 7  | BCL6             | 3.0                        | 116                     | 38.67              |
| 8  | PSG11            | 3.0                        | 112                     | 37.33              |
| 9  | HLADRB5          | 3.0                        | 103                     | 34.33              |
| 10 | PSG5             | 3.0                        | 101                     | 33.67              |
| 11 | PSG6             | 3.0                        | 97                      | 32.33              |
| 12 | PSG8             | 3.0                        | 93                      | 31.0               |
| 13 | WDR1             | 3.0                        | 91                      | 30.33              |
| 14 | TMEM14C          | 3.0                        | 89                      | 29.67              |
| 15 | OR11H4           | 3.0                        | 89                      | 29.67              |
| 16 | FDFT1            | 3.0                        | 88                      | 29.33              |
| 17 | CD300A           | 3.0                        | 86                      | 28.67              |
| 18 | WDR74            | 3.0                        | 86                      | 28.67              |
| 19 | USP17L7          | 3.0                        | 85                      | 28.33              |
| 20 | CCDC144NL        | 3.0                        | 82                      | 27.33              |
| 21 | TUBA3C           | 3.0                        | 79                      | 26.33              |
| 22 | PRR21            | 3.0                        | 79                      | 26.33              |
| 23 | USP17L2          | 3.0                        | 78                      | 26.0               |
| 24 | CGB              | 3.0                        | 76                      | 25.33              |
| 25 | ORC5             | 3.0                        | 76                      | 25.33              |
| 26 | KRTAP48          | 3.0                        | 76                      | 25.33              |
| 27 | PRLH             | 3.0                        | 75                      | 25.0               |
| 28 | HIST1H2BA        | 3.0                        | 75                      | 25.0               |
| 29 | OR2T27           | 3.0                        | 74                      | 24.67              |
| 30 | DEF8             | 3.0                        | 73                      | 24.33              |
| 31 | ZNF16            | 3.0                        | 73                      | 24.33              |
| 32 | JAKMIP3          | 3.0                        | 72                      | 24.0               |
| 33 | KIR2DS4          | 3.0                        | 71                      | 23.67              |
| 34 | ZFAND2A          | 3.0                        | 71                      | 23.67              |
| 35 | D2HGDH           | 3.0                        | 70                      | 23.33              |
| 36 | OR13C5           | 3.0                        | 69                      | 23.0               |
| 37 | HIST1H2AA        | 3.0                        | 68                      | 22.67              |
| 38 | PSG9             | 3.0                        | 68                      | 22.67              |
| 39 | PLEKHN1          | 3.0                        | 68                      | 22.67              |
| 40 | POLDIP3          | 3.0                        | 67                      | 22.33              |
| 41 | FRMD1            | 3.0                        | 67                      | 22.33              |
| 42 | OR51F1           | 3.0                        | 67                      | 22.33              |
| 43 | PGPEP1L          | 3.0                        | 67                      | 22.33              |
| 44 | KRTAP98          | 3.0                        | 67                      | 22.33              |
| 45 | TCL1A            | 3.0                        | 66                      | 22.0               |
| 46 | FAM160B2         | 3.0                        | 66                      | 22.0               |
| 47 | PSG1             | 3.0                        | 66                      | 22.0               |
| 48 | TRMT10B          | 3.0                        | 66                      | 22.0               |
| 49 | C12orf57         | 3.0                        | 66                      | 22.0               |
| 50 | MCPH1            | 3.0                        | 66                      | 22.0               |

|     | <b>Gene name</b> | <b>Element length [kb]</b> | <b>Nbr. of all SNPs</b> | <b>SNP density</b> |
|-----|------------------|----------------------------|-------------------------|--------------------|
| 51  | SERPINA9         | 3.0                        | 66                      | 22.0               |
| 52  | TUSC5            | 3.0                        | 66                      | 22.0               |
| 53  | CGB7             | 3.0                        | 66                      | 22.0               |
| 54  | C19orf10         | 3.0                        | 66                      | 22.0               |
| 55  | FCGR3B           | 3.0                        | 65                      | 21.67              |
| 56  | TTI2             | 3.0                        | 65                      | 21.67              |
| 57  | PRTN3            | 3.0                        | 65                      | 21.67              |
| 58  | DEFB1            | 3.0                        | 65                      | 21.67              |
| 59  | SLC35G4          | 3.0                        | 65                      | 21.67              |
| 60  | LILRB2           | 3.0                        | 65                      | 21.67              |
| 61  | RFPL3            | 3.0                        | 65                      | 21.67              |
| 62  | TMEM88B          | 3.0                        | 65                      | 21.67              |
| 63  | GCC2             | 3.0                        | 64                      | 21.33              |
| 64  | SSR1             | 3.0                        | 64                      | 21.33              |
| 65  | TLDC1            | 3.0                        | 64                      | 21.33              |
| 66  | PSG2             | 3.0                        | 64                      | 21.33              |
| 67  | KRT5             | 3.0                        | 64                      | 21.33              |
| 68  | IFITM2           | 3.0                        | 63                      | 21.0               |
| 69  | CES1             | 3.0                        | 63                      | 21.0               |
| 70  | ALG12            | 3.0                        | 63                      | 21.0               |
| 71  | AQP12B           | 3.0                        | 63                      | 21.0               |
| 72  | ZNF761           | 3.0                        | 63                      | 21.0               |
| 73  | HIST1H2BF        | 3.0                        | 63                      | 21.0               |
| 74  | IRGM             | 3.0                        | 63                      | 21.0               |
| 75  | ZNF57            | 3.0                        | 63                      | 21.0               |
| 76  | OR5H6            | 3.0                        | 63                      | 21.0               |
| 77  | MSLN             | 3.0                        | 63                      | 21.0               |
| 78  | CYP4F12          | 3.0                        | 62                      | 20.67              |
| 79  | HIST1H4H         | 3.0                        | 62                      | 20.67              |
| 80  | GZMM             | 3.0                        | 62                      | 20.67              |
| 81  | PSG3             | 3.0                        | 62                      | 20.67              |
| 82  | C1QTNF8          | 3.0                        | 62                      | 20.67              |
| 83  | MS4A12           | 3.0                        | 61                      | 20.33              |
| 84  | ZNF812           | 3.0                        | 61                      | 20.33              |
| 85  | AMTN             | 3.0                        | 61                      | 20.33              |
| 86  | ZNF773           | 3.0                        | 61                      | 20.33              |
| 87  | CRELD2           | 3.0                        | 61                      | 20.33              |
| 88  | SLC35G5          | 3.0                        | 61                      | 20.33              |
| 89  | PLCG2            | 3.0                        | 61                      | 20.33              |
| 90  | HIST1H2AC        | 3.0                        | 61                      | 20.33              |
| 91  | TMEM105          | 3.0                        | 61                      | 20.33              |
| 92  | TREML4           | 3.0                        | 61                      | 20.33              |
| 93  | ZNF443           | 3.0                        | 61                      | 20.33              |
| 94  | SLC22A16         | 3.0                        | 61                      | 20.33              |
| 95  | XCL2             | 3.0                        | 61                      | 20.33              |
| 96  | TTLL10           | 3.0                        | 61                      | 20.33              |
| 97  | DHRS4            | 3.0                        | 60                      | 20.0               |
| 98  | ZNF320           | 3.0                        | 60                      | 20.0               |
| 99  | CD7              | 3.0                        | 60                      | 20.0               |
| 100 | RPUSD1           | 3.0                        | 60                      | 20.0               |
