# Supplementary material for: SNP and indel frequencies at transcription start sites and at canonical and alternative translation initiation sites in the human genome
Source: PubMed Central journal article supplement (PMC6461226; doi:10.1371/journal.pone.0214816), 2019-04-12
Supplement: pone.0214816.s016.pdf [file pone.0214816.s016.pdf]

S9 Table

|                          | <b>Term</b>                                                               | <b># Genes</b> | <b>% Genes</b> | <b>Adjusted p-value</b> |
|--------------------------|---------------------------------------------------------------------------|----------------|----------------|-------------------------|
| <b>ApA (530 genes)</b>   | 1. Detection of chemical stimulus involved in sensory perception of smell | 97             | 18.3           | $1.4 \times 10^{-61}$   |
|                          | 2. Olfactory receptor                                                     | 97             | 18.3           | $1.1 \times 10^{-61}$   |
|                          | 3. Olfactory receptor activity                                            | 97             | 18.3           | $3.5 \times 10^{-61}$   |
|                          | 4. Olfaction                                                              | 97             | 18.3           | $7.1 \times 10^{-61}$   |
|                          | 5. Olfactory transduction                                                 | 97             | 18.3           | $3.4 \times 10^{-53}$   |
|                          | 6. Sensory transduction                                                   | 103            | 19.4           | $5.8 \times 10^{-52}$   |
|                          | 7. G-protein coupled receptor activity                                    | 108            | 20.4           | $1.6 \times 10^{-49}$   |
|                          | 8. GPCR, rhodopsin-like, 7TM                                              | 105            | 19.8           | $1.5 \times 10^{-46}$   |
|                          | 9. G-protein coupled receptor                                             | 112            | 21.1           | $1.5 \times 10^{-46}$   |
|                          | 10. G-protein coupled receptor, rhodopsin-like                            | 103            | 19.4           | $6.2 \times 10^{-46}$   |
|                          | 11. Transducer                                                            | 113            | 21.3           | $2.4 \times 10^{-44}$   |
|                          | 12. G-protein coupled receptor signaling pathway                          | 112            | 21.1           | $7.4 \times 10^{-42}$   |
|                          | 13. Receptor                                                              | 132            | 24.9           | $4.6 \times 10^{-29}$   |
|                          | 14. Topological domain: extracellular                                     | 161            | 30.4           | $9.4 \times 10^{-20}$   |
|                          | 15. Disulfide bond                                                        | 162            | 30.6           | $2.8 \times 10^{-18}$   |
|                          | 16. Topological domain: cytoplasmic                                       | 179            | 33.8           | $1.3 \times 10^{-17}$   |
|                          | 17. Glycosylation site: N-linked                                          | 202            | 38.1           | $3.9 \times 10^{-16}$   |
|                          | 18. Odorant binding                                                       | 26             | 4.9            | $3.3 \times 10^{-16}$   |
|                          | 19. Disulfide bond                                                        | 173            | 32.6           | $2.8 \times 10^{-16}$   |
|                          | 20. Glycoprotein                                                          | 209            | 39.4           | $1.1 \times 10^{-14}$   |
|                          | 21. Cell membrane                                                         | 156            | 29.4           | $3.5 \times 10^{-13}$   |
|                          | 22. Detection of chemical stimulus involved in sensory perception         | 22             | 4.2            | $1.2 \times 10^{-11}$   |
|                          | 23. Plasma membrane                                                       | 184            | 34.7           | $2.7 \times 10^{-11}$   |
|                          | 24. Sensory perception of smell                                           | 24             | 4.5            | $1.4 \times 10^{-9}$    |
|                          | 25. Transmembrane region                                                  | 202            | 38.1           | $1.0 \times 10^{-8}$    |
|                          | 26. Transmembrane helix                                                   | 216            | 40.8           | $1.8 \times 10^{-8}$    |
|                          | 27. Integral component of membrane                                        | 199            | 37.5           | $9.1 \times 10^{-8}$    |
|                          | 28. Transmembrane                                                         | 216            | 40.8           | $2.2 \times 10^{-8}$    |
|                          | 29. Transmembrane signaling receptor activity                             | 22             | 4.2            | $6.1 \times 10^{-5}$    |
|                          | 30. Membrane                                                              | 255            | 48.1           | $4.3 \times 10^{-5}$    |
| <b>ApC (392 genes)</b>   | 1. Extracellular space                                                    | 45             | 11.5           | $3.6 \times 10^{-1}$    |
|                          | 2. Biosynthesis of antibiotics                                            | 12             | 3.1            | $2.8 \times 10^{-1}$    |
| <b>ApG (1,011 genes)</b> | 1. Domain: Leucine-zipper                                                 | 17             | 1.7            | $5.7 \times 10^{-1}$    |
|                          | 2. DNA-binding region: basic motif                                        | 20             | 2.0            | $9.5 \times 10^{-1}$    |
| <b>ApT (223 genes)</b>   | 1. Commissural neuron axon guidance                                       | 3              | 1.3            | $9.8 \times 10^{-1}$    |
|                          | 2. Disulfide bond                                                         | 55             | 24.7           | $7.6 \times 10^{-1}$    |
