# Supplementary material for: SNP and indel frequencies at transcription start sites and at canonical and alternative translation initiation sites in the human genome
Source: PubMed Central journal article supplement (PMC6461226; doi:10.1371/journal.pone.0214816), 2019-04-12
Supplement: pone.0214816.s017.pdf [file pone.0214816.s017.pdf]

**S10 Table**

|                          | <b>Term</b>                                                               | <b># Genes</b> | <b>% Genes</b> | <b>Adjusted p-value</b> |
|--------------------------|---------------------------------------------------------------------------|----------------|----------------|-------------------------|
| <b>CpA (3,412 genes)</b> | 1. Topological domain: extracellular                                      | 587            | 17.2           | $1.9 \times 10^{-5}$    |
|                          | 2. G-protein coupled receptor signaling pathway                           | 213            | 6.2            | $1.8 \times 10^{-4}$    |
|                          | 3. Olfactory receptor activity                                            | 112            | 3.3            | $7.5 \times 10^{-5}$    |
|                          | 4. GPCR, rhodopsin-like, 7TM                                              | 174            | 5.1            | $1.5 \times 10^{-4}$    |
|                          | 5. G-protein coupled receptor, rhodopsin-like                             | 170            | 5.0            | $1.0 \times 10^{-4}$    |
|                          | 6. Olfactory receptor                                                     | 112            | 3.3            | $7.4 \times 10^{-5}$    |
|                          | 7. Detection of chemical stimulus involved in sensory perception of smell | 111            | 3.3            | $2.5 \times 10^{-4}$    |
|                          | 8. Olfaction                                                              | 114            | 3.3            | $5.4 \times 10^{-5}$    |
|                          | 9. Topological domain: cytoplasmic                                        | 701            | 20.5           | $3.7 \times 10^{-4}$    |
|                          | 10. Transmembrane region                                                  | 981            | 28.8           | $2.5 \times 10^{-4}$    |
|                          | 11. Transducer                                                            | 207            | 6.1            | $5.3 \times 10^{-5}$    |
|                          | 12. G-protein coupled receptor                                            | 194            | 5.7            | $5.4 \times 10^{-5}$    |
|                          | 13. Glycosylation site: N-linked (GlcNAc...)                              | 844            | 24.7           | $8.1 \times 10^{-4}$    |
|                          | 14. Olfactory transduction                                                | 112            | 3.3            | $2.5 \times 10^{-4}$    |
|                          | 15. Integral component of membrane                                        | 989            | 29.0           | $1.0 \times 10^{-3}$    |
|                          | 16. Glycoprotein                                                          | 906            | 26.6           | $1.9 \times 10^{-4}$    |
|                          | 17. Sensory transduction                                                  | 146            | 4.3            | $1.9 \times 10^{-4}$    |
|                          | 18. G-protein coupled receptor activity                                   | 163            | 4.8            | $1.7 \times 10^{-3}$    |
|                          | 19. Transmembrane                                                         | 1076           | 31.5           | $2.5 \times 10^{-4}$    |
|                          | 20. Transmembrane helix                                                   | 1072           | 31.4           | $2.4 \times 10^{-4}$    |
|                          | 21. Cell membrane                                                         | 635            | 18.6           | $4.1 \times 10^{-4}$    |
|                          | 22. Receptor                                                              | 350            | 10.3           | $6.8 \times 10^{-4}$    |
|                          | 23. Nucleosome core                                                       | 31             | 0.9            | $1.6 \times 10^{-3}$    |
|                          | 24. Sensory perception of smell                                           | 44             | 1.3            | $8.6 \times 10^{-2}$    |
|                          | 25. Histone-fold                                                          | 35             | 1.0            | $4.0 \times 10^{-2}$    |
|                          | 26. Keratin-associated matrix                                             | 11             | 0.3            | $3.6 \times 10^{-2}$    |
|                          | 27. Disulfide bond                                                        | 670            | 19.6           | $3.6 \times 10^{-3}$    |
|                          | 28. TAF                                                                   | 10             | 0.3            | $4.1 \times 10^{-2}$    |
|                          | 29. H4                                                                    | 10             | 0.3            | $4.1 \times 10^{-2}$    |
|                          | 30. TATA box binding protein associated factor (TAF)                      | 10             | 0.3            | $3.9 \times 10^{-2}$    |
|                          | 31. Histone H4                                                            | 10             | 0.3            | $3.9 \times 10^{-2}$    |
| <b>CpC (1,289 genes)</b> | 1. Mitochondrion                                                          | 119            | 9.2            | $3.6 \times 10^{-1}$    |
|                          | 2. Neuron projection                                                      | 30             | 2.3            | $5.0 \times 10^{-1}$    |
| <b>CpG (2,136 genes)</b> | see Table 2 in the main manuscript                                        |                |                |                         |
| <b>CpT (625 genes)</b>   | 1. Signal                                                                 | 153            | 24.5           | $7.1 \times 10^{-1}$    |
|                          | 2. Secreted                                                               | 84             | 13.4           | $4.8 \times 10^{-1}$    |
