# Supplementary material for: SNP and indel frequencies at transcription start sites and at canonical and alternative translation initiation sites in the human genome
Source: PubMed Central journal article supplement (PMC6461226; doi:10.1371/journal.pone.0214816), 2019-04-12
Supplement: pone.0214816.s018.pdf [file pone.0214816.s018.pdf]

## S11 Table

|                          | <b>Term</b>                                                      | <b># Genes</b> | <b>% Genes</b> | <b>Adjusted p-value</b> |
|--------------------------|------------------------------------------------------------------|----------------|----------------|-------------------------|
| <b>GpA (1,005 genes)</b> | 1. G-protein coupled receptor activity                           | 61             | 6.1            | $9.0 \times 10^{-3}$    |
|                          | 2. G-protein coupled receptor, rhodopsin-like                    | 60             | 6.0            | $4.7 \times 10^{-2}$    |
|                          | 3. G-protein coupled receptor                                    | 68             | 6.8            | $2.0 \times 10^{-2}$    |
|                          | 4. Odorant binding                                               | 16             | 1.6            | $2.4 \times 10^{-2}$    |
|                          | 5. GPCR, rhodopsin-like, 7TM                                     | 60             | 6.0            | $4.8 \times 10^{-2}$    |
| <b>GpC (871 genes)</b>   | 1. Calcium transport                                             | 16             | 1.8            | $4.0 \times 10^{-2}$    |
| <b>GpG (1,413 genes)</b> | 1. Splice variant                                                | 637            | 45.1           | $3.2 \times 10^{-2}$    |
| <b>GpT (282 genes)</b>   | 1. IL12 and Stat4 Dependent Signaling Pathway in Th1 Development | 4              | 1.4            | $1.6 \times 10^{-1}$    |
|                          | 2. snRNA processing                                              | 3              | 1.1            | 1.0                     |
