# Supplementary material for: SNP and indel frequencies at transcription start sites and at canonical and alternative translation initiation sites in the human genome
Source: PubMed Central journal article supplement (PMC6461226; doi:10.1371/journal.pone.0214816), 2019-04-12
Supplement: pone.0214816.s019.pdf [file pone.0214816.s019.pdf]

**S12 Table**

|                          | <b>Term</b>                                                               | <b># Genes</b> | <b>% Genes</b> | <b>Adjusted p-value</b> |
|--------------------------|---------------------------------------------------------------------------|----------------|----------------|-------------------------|
| <b>TpA (951 genes)</b>   | 1. Olfaction                                                              | 49             | 5.2            | $6.1 \times 10^{-6}$    |
|                          | 2. Olfactory receptor activity                                            | 48             | 5.0            | $1.5 \times 10^{-5}$    |
|                          | 3. Detection of chemical stimulus involved in sensory perception of smell | 48             | 5.0            | $5.0 \times 10^{-5}$    |
|                          | 4. Olfactory receptor                                                     | 48             | 5.0            | $4.1 \times 10^{-5}$    |
|                          | 5. Olfactory transduction                                                 | 50             | 5.3            | $1.3 \times 10^{-5}$    |
|                          | 6. Sensory transduction                                                   | 58             | 6.1            | $8.5 \times 10^{-5}$    |
|                          | 7. G-protein coupled receptor activity                                    | 59             | 6.2            | $7.2 \times 10^{-3}$    |
| <b>TpC (698 genes)</b>   | 1. Transcription factor activity, sequence-specific DNA binding           | 59             | 8.5            | $1.0 \times 10^{-1}$    |
|                          | 2. DNA-binding                                                            | 100            | 14.3           | $7.1 \times 10^{-1}$    |
| <b>TpG (1,519 genes)</b> | 1. Xenobiotic metabolic process                                           | 16             | 1.1            | $9.7 \times 10^{-1}$    |
|                          | 2. Protease inhibitor                                                     | 20             | 1.3            | $8.2 \times 10^{-1}$    |
| <b>TpT (238 genes)</b>   | 1. Kinetochore binding                                                    | 3              | 1.3            | $3.4 \times 10^{-1}$    |
|                          | 2. Negative regulation of transcription, DNA-templated                    | 16             | 6.7            | $7.6 \times 10^{-1}$    |
